# Supplementary material for: Sonochemical synthesis of cyclophosphazene bridged mesoporous organosilicas and their application in methyl orange, congo red and Cr(vi) removal
Source: Royal Society of Chemistry journal article supplement (doi:10.1039/c5ra11622h), 2015-01-01
Supplement: c5ra11622h1.pdf [file c5ra11622h1.pdf]

## Supporting information

### **Sonochemical synthesis of cyclophosphazene bridged mesoporous organosilicas and their application in methyl orange, congo red and Cr(VI) removal**

Pawan Rekha, Raesh Muhammad and Paritosh Mohanty\*

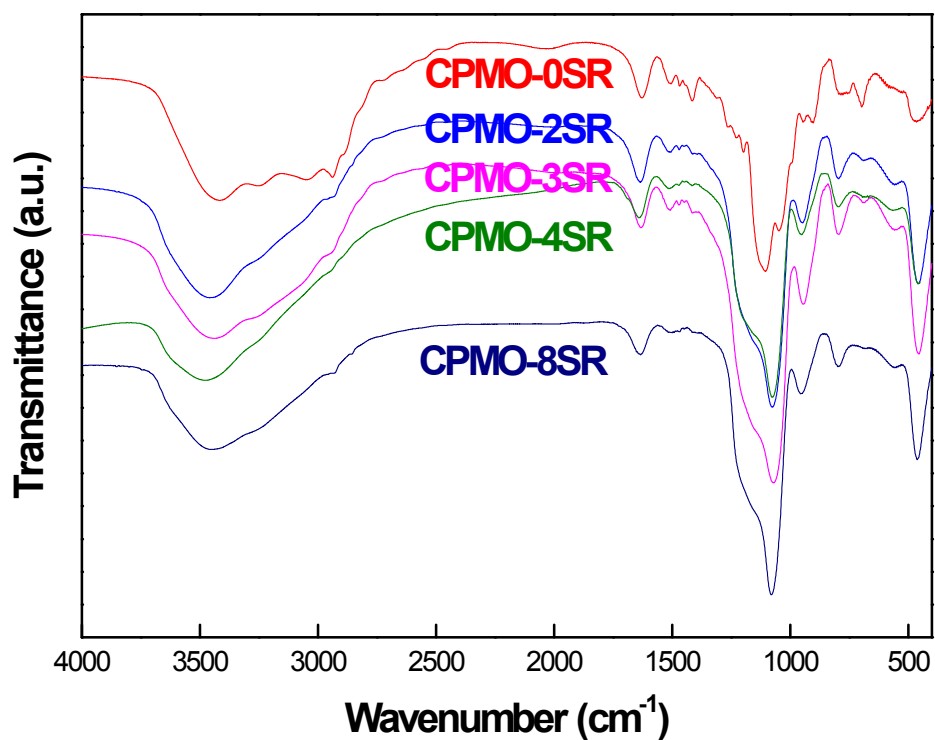

**Figure S1.** FT-IR of CPMOs

**Table S1.** Observed FT-IR band positions along with their assignments of CPMOs

| Band assignments                       | Wavenumber (cm <sup>-1</sup> ) |
|----------------------------------------|--------------------------------|
| C-H stretching(APTES)                  | 2929-2856                      |
| $\nu_{\text{as}}$ (P=N-P)              | 1406-1418                      |
| P=N                                    | 1196-1209                      |
| Si-O-Si and $\nu_{\text{as}}$ (P-NH-P) | 1237-1050                      |
| $\nu_{\text{as}}$ (P-NH-P) and Si-OH   | 950                            |
| Si-O-Si                                | 800                            |
| $\delta$ (P=N-P)                       | 544-555                        |

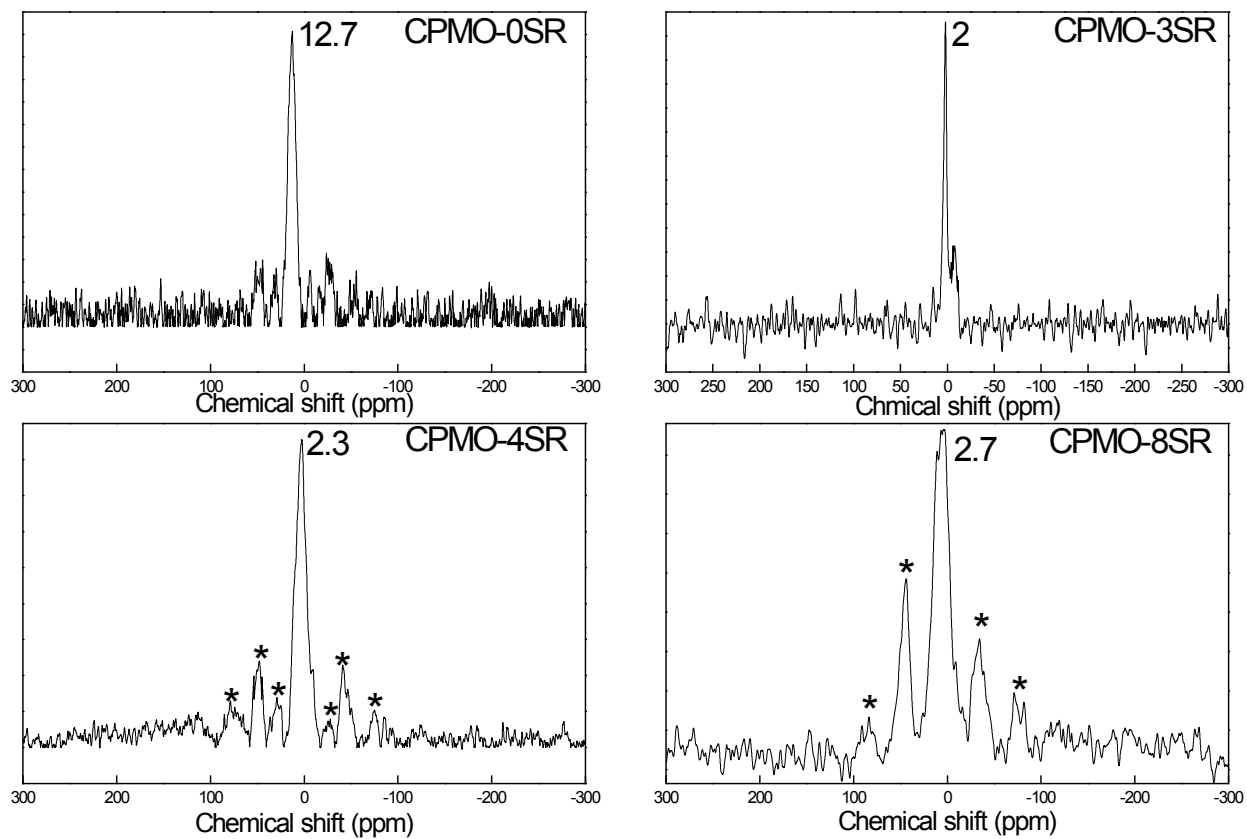

**Figure S2.**  $^{31}\text{P}$  CPMAS NMR of CPMOs synthesized by sonication

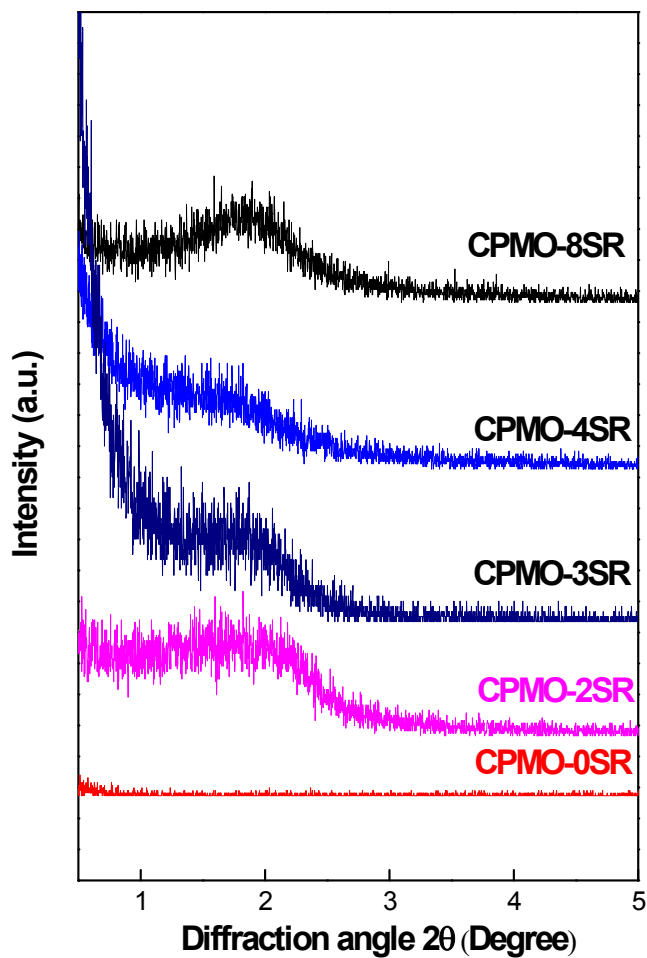

**Figure S3.** Small angle X-ray scattering pattern of CPMOs

**Table S2.** Position and % of the *T* and *Q* sites in different samples

| Sample ID | Position of <i>T</i> sites          |                                     | Position of <i>Q</i> sites          |                                     |                                     |
|-----------|-------------------------------------|-------------------------------------|-------------------------------------|-------------------------------------|-------------------------------------|
|           | <i>T</i> <sup>2</sup> (ppm),<br>(%) | <i>T</i> <sup>3</sup> (ppm),<br>(%) | <i>Q</i> <sup>2</sup> (ppm),<br>(%) | <i>Q</i> <sup>3</sup> (ppm),<br>(%) | <i>Q</i> <sup>4</sup> (ppm),<br>(%) |
| CPMO-0SR  | -58, (27.6)                         | -66, (72.4)                         | --                                  | --                                  | --                                  |
| CPMO-4SR  | -57, (20.1)                         | -66, (8.4)                          | -90, (8.1)                          | -100, (47.9)                        | -110, (15.5)                        |

**Table S3.** C, H and N elemental analysis of CPMOs

| Sample ID | N (wt%) | C (wt%) | H (wt%) | C/N ratio |
|-----------|---------|---------|---------|-----------|
| CPMO-0SR  | 11.71   | 23.62   | 5.28    | 2.01      |
| CPMO-2SR  | 6.19    | 11.85   | 3.17    | 1.91      |
| CPMO-3SR  | 5.22    | 9.58    | 3.13    | 1.83      |
| CPMO-4SR  | 5.14    | 8.93    | 2.85    | 1.73      |
| CPMO-8SR  | 4.86    | 8.28    | 2.1     | 1.70      |

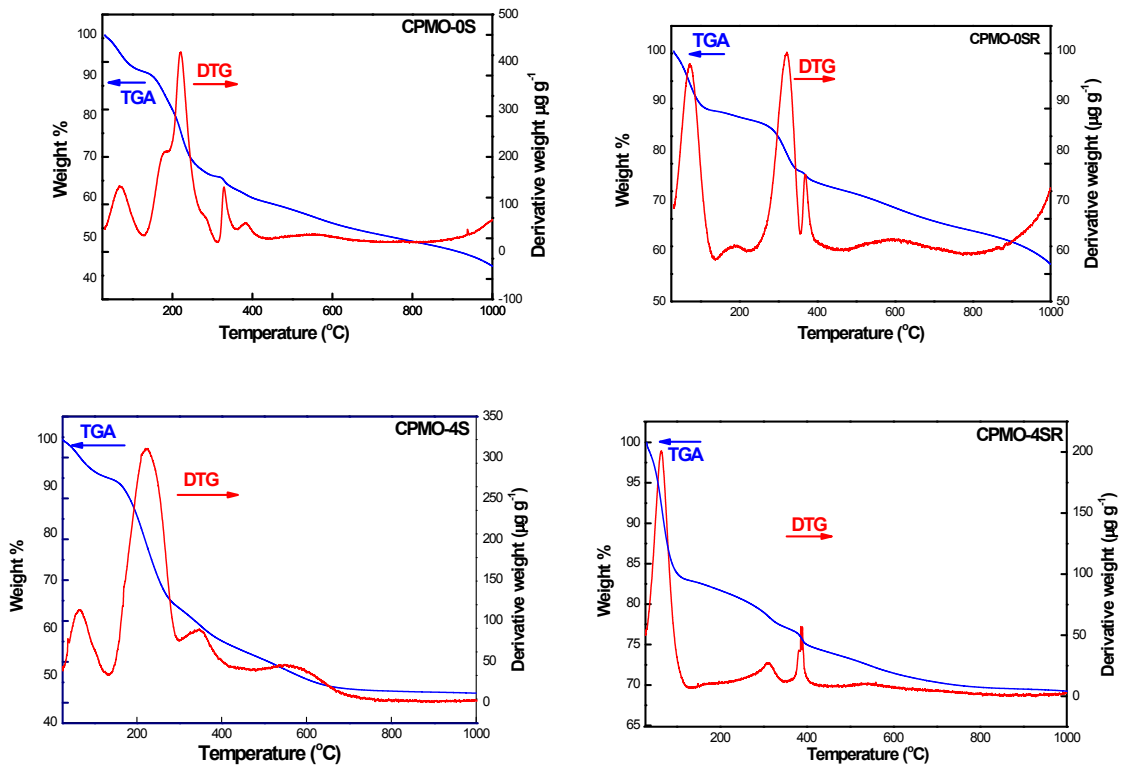

**Figure S4.** TGA and DTG thermograms of CPMOs measured in nitrogen atmosphere with a heating rate of  $10\text{ }^{\circ}\text{C min}^{-1}$

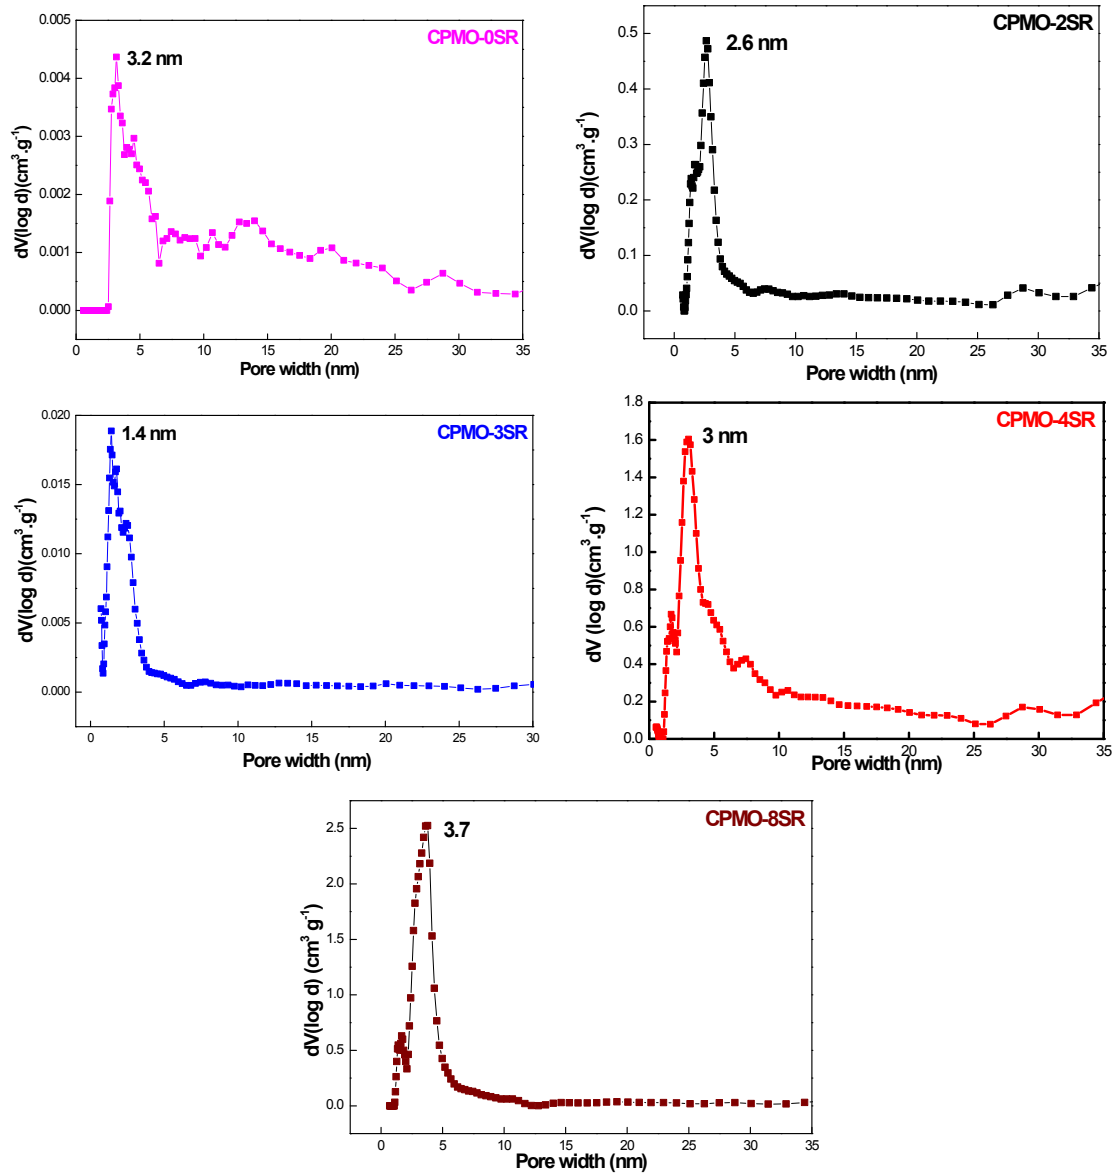

Figure S5. Pore size distribution of CPMOs

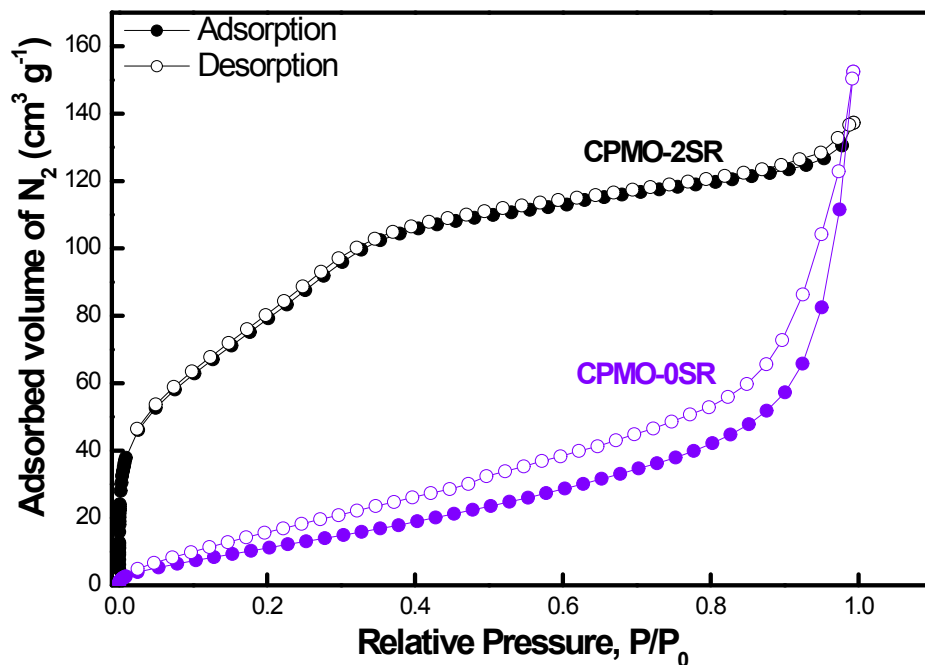

Figure S6.  $N_2$  sorption isotherms of CPMO-0SR and CPMO-4SR measured at 77 K

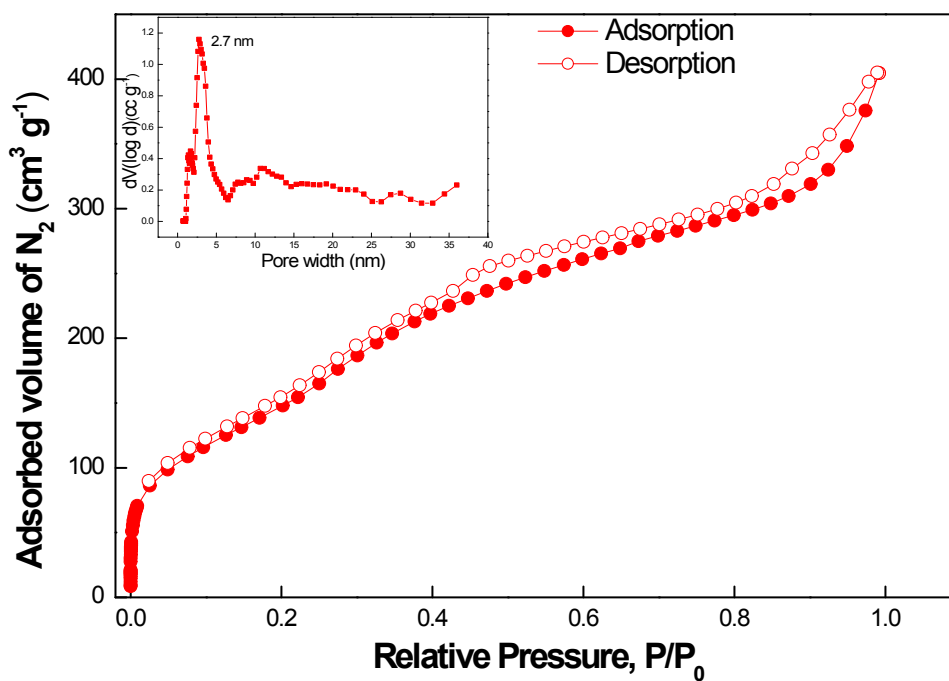

Figure S7.  $N_2$  sorption isotherm of PMO-4S (without PNC) measured at 77 K

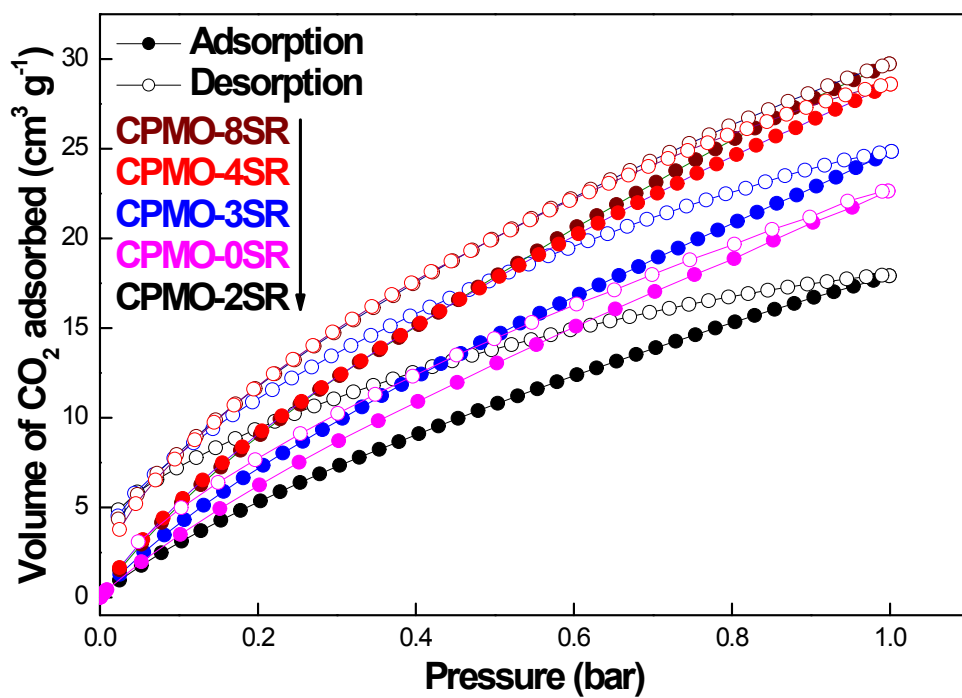

Figure S8. CO<sub>2</sub> sorption isotherms of CPMOs measured at 273K



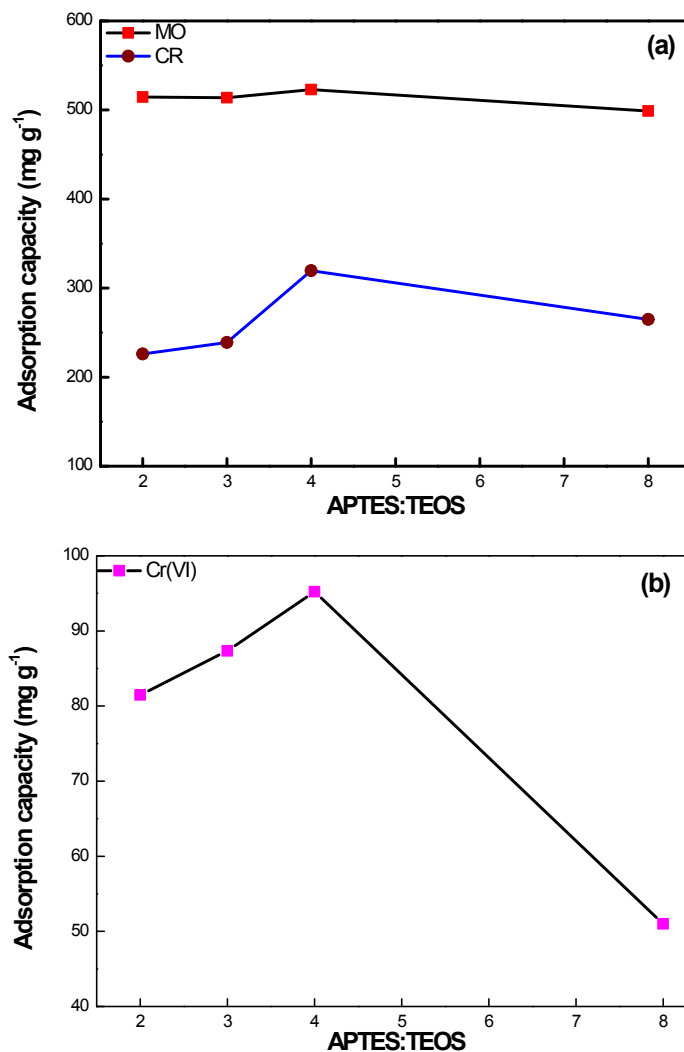

**Figure S9.** Comparison of adsorption capacity of CPMOs for (a) organic dyes and (b) Cr(VI) ions removal

**Table S4.** Comparison of adsorption capacities of CPMOs for (a) organic dyes and (b) Cr(VI) ions removal

| Sample ID | MO ( $q_{\max}$ )(mg g <sup>-1</sup> ) | CR ( $q_{\max}$ )(mg g <sup>-1</sup> ) | Cr(VI)( $q_{\max}$ )(mg g <sup>-1</sup> ) |
|-----------|----------------------------------------|----------------------------------------|-------------------------------------------|
| CPMO-2SR  | 514.515                                | 226                                    | 81.469                                    |
| CPMO-3SR  | 513.857                                | 239                                    | 87.338                                    |
| CPMO-4SR  | 523                                    | 319.46                                 | 95.206                                    |
| CPMO-8SR  | 498.817                                | 264.79                                 | 51                                        |
| PMO-4S    | 474.307                                | 281.32                                 | 73.3                                      |

**Table S5:** Adsorption capacities  $q_{\max}$  for Cr (VI) removal of selected results from the literature

| Silica type                                                    | $q_{\max}$ (mg g <sup>-1</sup> ) | Ref.                |
|----------------------------------------------------------------|----------------------------------|---------------------|
| 3 Aminopropyl functionalized MCM-48                            | 65                               | S1                  |
| 6-amino-4-azahexyl functionalized MCM-48                       | 119                              | S1                  |
| 9-amino-4,7-diazanonyl functionalized MCM-48                   | 160                              | S1                  |
| AP-TMS modified MCM-45                                         | 40                               | S2                  |
| Amine-Functionalized Mesoporous Silica                         | 82                               | S3                  |
| Magnetic functionalized MCM-48 mesoporous silica with melamine | 115.6                            | S4                  |
| <b>CPMO-4SR</b>                                                | <b>101</b>                       | <b>Present work</b> |

**Table S6:** Adsorption capacities  $q_{\max}$  for methyl orange removal of selected results from the literature

| Material type                                 | $q_{\max}$ (mg g <sup>-1</sup> ) | Ref.                |
|-----------------------------------------------|----------------------------------|---------------------|
| Ammonium-functionalized silica nanoparticle   | 105.4                            | S5                  |
| Mesoporous carbon material                    | 294.1                            | S6                  |
| Alkali-activated multiwalled carbon nanotubes | 149                              | S7                  |
| Poly HEMA–chitosan-MWCNT nano-composite       | 306                              | S8                  |
| <b>CPMO-4SR</b>                               | <b>523</b>                       | <b>Present work</b> |

**Table S7:** Adsorption capacities  $q_{\max}$  for congo red removal of selected results from the literature

| Silica type                                      | $q_{\max}$ (mg g <sup>-1</sup> ) | Ref.                |
|--------------------------------------------------|----------------------------------|---------------------|
| Modified xanthan gum/silica hybrid nanocomposite | 209.21                           | S9                  |
| Graphene oxide/chitosan fibers                   | 294.12                           | S10                 |
| Maghemite nanoparticles                          | 208.33                           | S11                 |
| Cu-BTC                                           | 959.9                            | S12                 |
| Ni50/Cu-BTC                                      | 1078                             | S12                 |
| <b>CPMO-4 SR</b>                                 | <b>320</b>                       | <b>Present work</b> |

**Table S8.** Thermodynamic parameters for the adsorption of organic dyes and Cr(VI) ions by CPMO-4SR

|       | MO                                 | CR                                 | Cr(VI) ion |
|-------|------------------------------------|------------------------------------|------------|
| T (K) | $\Delta G$ (kJ mol <sup>-1</sup> ) | $\Delta G$ (kJ mol <sup>-1</sup> ) |            |
| 283   | --                                 | -0.292                             | --         |
| 293   | -8.095                             | -0.312                             | --         |
| 298   | -8.254                             | -0.324                             | -7.4       |
| 303   | -8.384                             | -0.321                             | --         |
| 313   | -8.635                             | -0.326                             | -5.089     |
| 323   | -8.80                              | -0.304                             | --         |
| 333   | -9.04                              | -0.301                             | -1.58      |
| 343   | --                                 | -0.289                             | --         |
| 353   | --                                 | -0.256                             | --         |

**Table S9.** Thermodynamic parameters for the adsorption of organic dyes and Cr(VI) ions by CPMO-4SR

| Adsorbate  | Thermodynamic parameters           |                                       |
|------------|------------------------------------|---------------------------------------|
|            | $\Delta H$ (kJ mol <sup>-1</sup> ) | $\Delta S$ [J (mol K) <sup>-1</sup> ] |
| MO         | -1.377                             | 23                                    |
| CR         | -0.461                             | -0.498                                |
| Cr(VI) ion | -7.096                             | -172                                  |

## References

- S1. T. Yokoi, Y. Kubota and T. Tatsumi, *Appl. Catal. A*, 2012, **421–422**, 14-37.
- S2. S. A. Idris, K. M. Alotaibi, T. A. Peshkur, P. Anderson and M. Morris, *Microporous Mesoporous Mater.*, 2013, **165**, 99-105.
- S3. X. Li, C. Han, W. Zhu, W. Ma, Y. Luo, Y. Zhou, J. Yu and K. Wei, *J. Chem.*, 2014, **2014**, 1-10.
- S4. M. Anbia, K. Kargosha and S. Khoshbooei, *Chem. Eng. Res. Des.*, 2015, **93**, 779-788.
- S5. J. Liu, S. Ma and L. Zang, *Appl. Surf. Sci.*, 2013, **265**, 393–398.
- S6. N. Mohammadi, H. Khani, V. K. Gupta, E. Amereh and S. Agarwal, *J. Colloid Interface Sci.*, 2011, **362**, 457–462.
- S7. J. Ma, F. Yu, L. Zhou, L. Jin, M. Yang, J. Luan, Y. Tang, H. Fan, Z. Yuan and J. Chen, *ACS Appl. Mater. Interfaces*, 2012, **4**, 5749–5760.
- S8. H. Mahmoodian, O. Moradi, B. Shariatzadeha, T. A. Salehf, I. Tyagi, A. Maity, M. Asif, and V. K. Gupta, *J. Mol. Liq.*, 2015, **202**, 189–198.

- S9. S. Ghorai, A. K. Sarkar, A. B. Panda and S. Pal, *Bioresour. Technol.*, 2013, **144**, 485–491.
- S10. Q. Du, J. Sun, Y. Li, X. Yang, X. Wang, Z. Wang and L. Xia, *Chem. Eng. J.*, 2014, **245**, 99–106.
- S11. A. Afkhami and R. Moosavi, *J. Hazard. Mater.*, 2010, **174**, 398–403.
- S12. J. Hu, H. Yu, W. Dai, X. Yan, X. Hu and H. Huang, *RSC Adv.*, 2014, **4**, 35124–35130.
